# Supplementary material for: Modeling the Impact of Investment and National Planning Policies on Future Land Use Development: A Case Study for Myanmar
Source: MDPI journal article supplement (doi:10.3390/ijgi12010022), 2023-01-13
Supplement: s1 [file s1]

Archive with 1 entries (1 files):
- ijgi-1949792-supplementary.pdf
